# Supplementary material
Source: PubMed Central journal article supplement (PMC8110639)
Supplement: 11357_2020_241_MOESM1_ESM.pdf [file 11357_2020_241_MOESM1_ESM.pdf]

**Title: Hemiterpene compound, 3,3-dimethylallyl alcohol promotes longevity and neuroprotection in *Caenorhabditis elegans***

**Journal: GeroScience**

Suresh Chandra Phulara<sup>1†</sup>, Swapnil Pandey<sup>2, 3†</sup>, Anubhuti Jha<sup>4</sup>, Puneet Singh Chauhan<sup>2, 3</sup>, Pratima Gupta<sup>4\*</sup>, Virendra Shukla<sup>5\*</sup>

<sup>1</sup> Department of Biotechnology, Koneru Lakshmaiah Education Foundation, Vaddeswaram, Guntur-522502, Andhra Pradesh, India

<sup>2</sup> Microbial Technology Division, CSIR-National Botanical Research Institute, 436, Rana Pratap Marg, Lucknow, 226001, India

<sup>3</sup> Academy of Scientific and Innovative Research (AcSIR), Ghaziabad 201002, India.

<sup>4</sup> Department of Biotechnology, National Institute of Technology Raipur, G.E. Road, Raipur, 492010, Chhattisgarh, India

<sup>5</sup> Department of Biochemistry and Molecular Biology, IMRIC, faculty of Medicine, The Hebrew University of Jerusalem, Ein Kerem, Jeusalem-9112102, Israel

† Both the authors contributed equally to this work

**Address to corresponding authors**

Dr. Virendra Shukla\*

Department of Biochemistry and Molecular Biology,  
IMRIC, faculty of Medicine,

The Hebrew University of Jerusalem,  
Ein Kerem, Jeusalem-9112102, Israel

Email: shuklavirendra121@gmail.com

ORCID ID: 0000-0002-1338-8994

Dr. Pratima Gupta\*,

Department of Biotechnology,  
National Institute of Technology, Raipur  
Chhattisgarh, 492010, India

Mo. No.: +91-700420752

Email: pguptabiotech@gmail.com

ORCID ID: 0000-0001-7651-1040

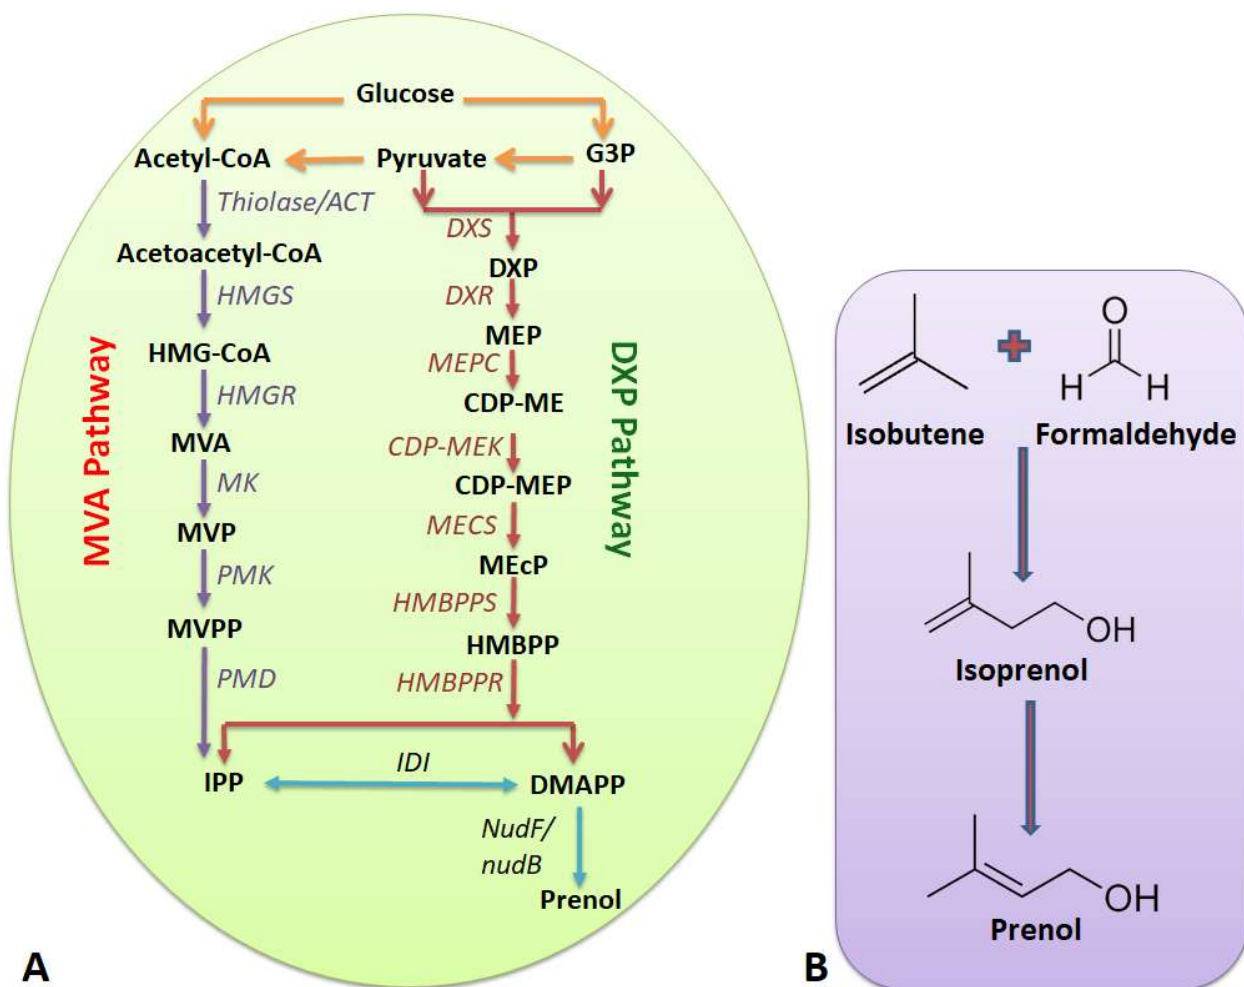

**Supplementary Fig. S1. Synthesis of Prenol.** Biosynthesis of Prenol from acetyl-CoA via MVA pathway and from glyceraldehyde-3-phosphate and pyruvate via DXP pathway. G3P, glyceraldehyde-3-phosphate; ACT, Acetoacetyl-CoA transferase; HMG-CoA, 3-hydroxy-3-methylglutaryl-CoA; HMGS, HMG-CoA synthase; HMGR, HMG-CoA reductase; MVA, mevalonate; MK, mevalonate kinase; MVP, mevalonate-5-phosphate; MVAPP, mevalonate pyrophosphate; PMK, phosphomevalonate kinase; PMD, pyrophosphomevalonatedecarboxylase; DXP, deoxyxylulose-5-phosphate; DXS, DXP; DXR, DXPreductoisomerase; MEP, 2C-methyl-D-erythritol-4-phosphate; MEPC, MEPcytidyltransferase; CDP-ME, 4-(Cytidine-5'-diphospho)-2-C-methylerythritol; CDP-MEK, CDP-ME kinase; CDP-MEP, 2-Phospho-4-(cytidine-5'-diphospho)-2-C-methylerythritol; MEcP, 2-CMethylerythritol-2,4-cyclodiphosphate; MECS, MEcP synthase; HMBPP, 1-hydroxy-2-methyl-2-(E)-butenyl-4-diphosphate; HMBPPS, HMBPPsythase; HMBPPR, HMBPPreductase; IPP, isopentenyl pyrophosphate; DMAPP, dimethylallyl pyrophosphate; IDI, isoprenyldiphosphateisomerase; NudF, ADP ribose pyrophosphatase. **B.** Chemical synthesis of Prenol from isobutene and formaldehyde

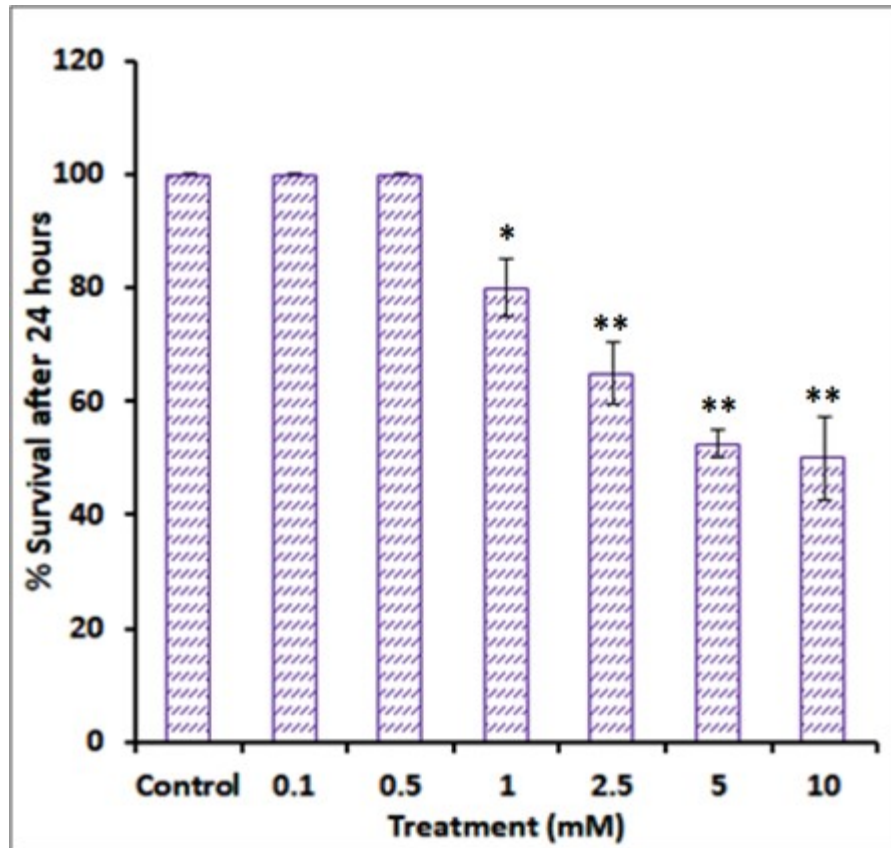

**Supplementary Fig. S2.** Toxicity assessment of Prenol in *C. elegans*. Higher concentrations [1 mM (n=169), 2.5 mM (n=172), 5 mM (n=178) and 10 mM (n=164)] of Prenol were found to be toxic to wild type worms, whereas, no obvious toxicity was observed at 0.1 mM (n=178) and 0.5 mM (n=172) concentrations. Data were considered significant at  $p \leq 0.05$ . Error bars represent the standard error of the mean. \* $p < 0.01$ , \*\* $p < 0.001$ .

n is the cumulative number of worms from two independent trials.

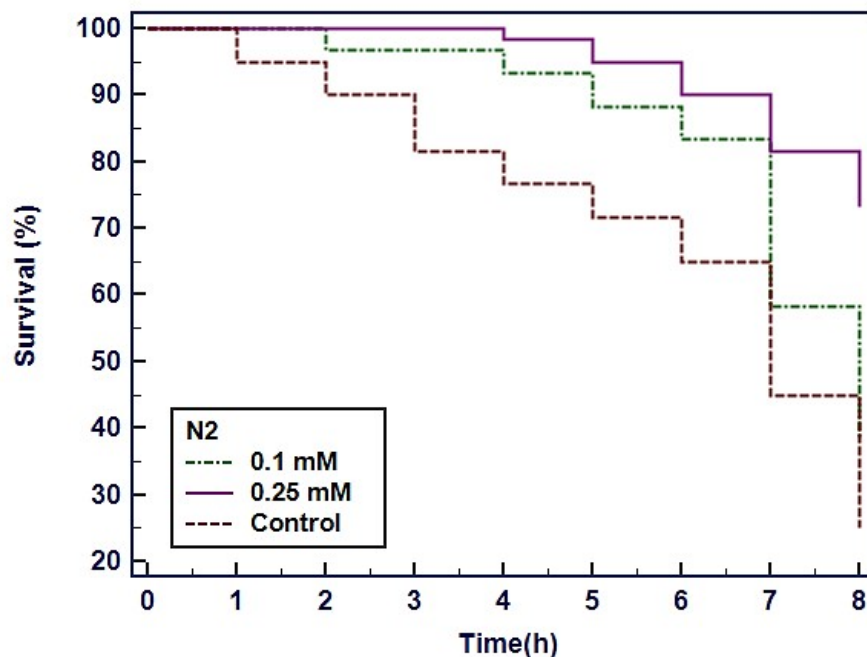

**Supplementary Fig. S3. Survival of the worm under juglone-induced oxidative stress.** Worms were synchronized on NGM plates treated with and without test concentration of Prenol. On adult day 2, the worms were transferred to fresh NGM plates treated with 250  $\mu$ M juglone to induce oxidative stress. Survival of the worms was measured after every 2 h until 8 h of continuous exposure to juglone. Worms treated with Prenol showed enhanced resistance to juglone-induced oxidative stress compared to untreated control worms. Experiments were performed in 3 independent trials for each test concentration. The data were processed using the Kaplan–Meir survival analysis in Medcalc17.9.7 software.

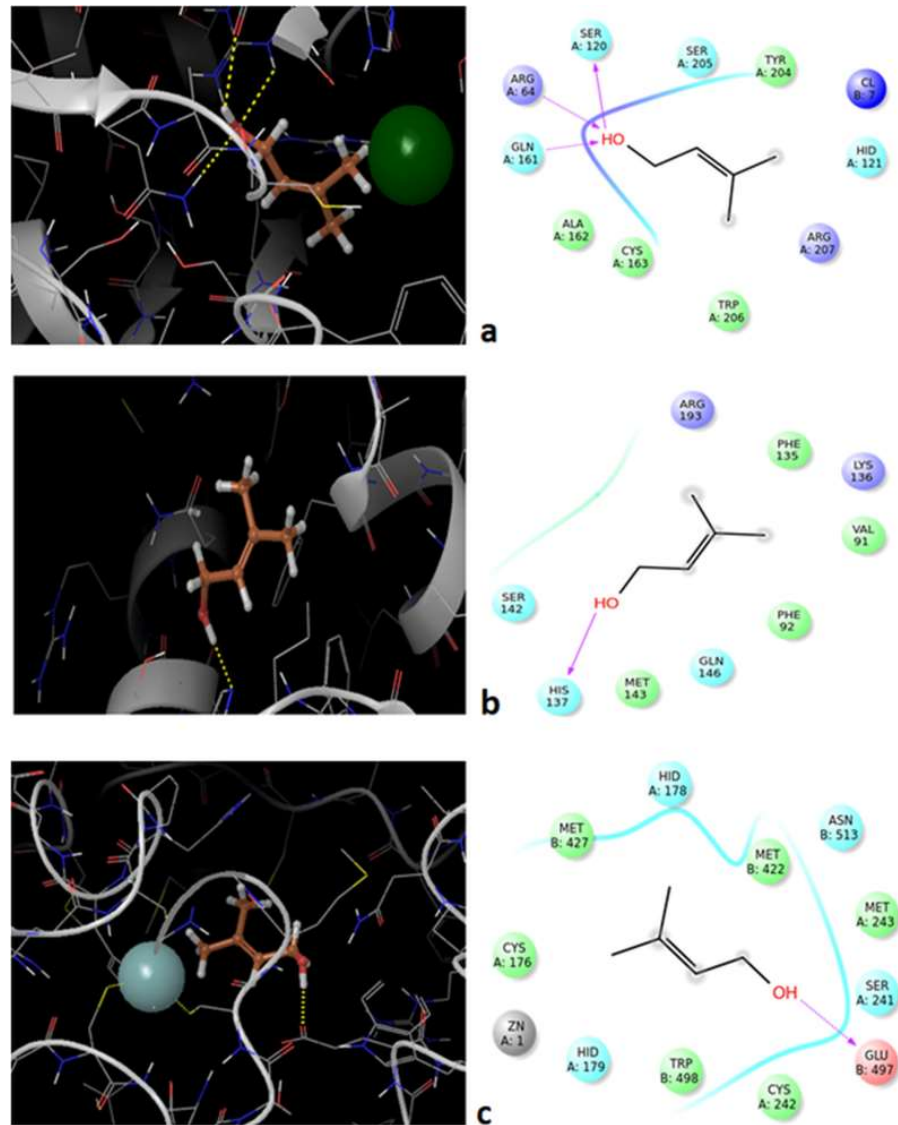

**Supplementary Fig. S4** *In-silico* prediction of molecular docking of Prenol on proteins DAF-16, HSF-1, and SKN-1. The figure indicates molecular docking between target proteins **a**. DAF-16, **b**. HSF-1, and **c**. SKN-1 with Prenol, respectively. Discontinuous yellow lines in left panel represent hydrogen bond interactions

**Table S1. Effect of Prenol on the thermal stress tolerance in *C. elegans*.**

| <b>Strain</b> | <b>Prenol Treatment</b> | <b>No. of worms</b> | <b>Mean lifespan <math>\pm</math> SE (Days)</b> | <b>% Change</b> | <b>p value</b> |
|---------------|-------------------------|---------------------|-------------------------------------------------|-----------------|----------------|
| N2            | Control                 | 110                 | 7.07 $\pm$ 0.175                                |                 |                |
|               | 0.1 mM                  | 118                 | 8.04 $\pm$ 0.20                                 | 13.7 %          | = 0.0004       |
|               | 0.25 mM                 | 117                 | 9.37 $\pm$ 0.28                                 | 32.53 %         | < 0.0001       |
